# Supplementary material for: Fetal Aortic Blood Flow Velocity and Power Doppler Profiles in the First Trimester: A Comprehensive Study Using High-Definition Flow Imaging
Source: MDPI journal article supplement (doi:10.3390/bioengineering11040378), 2024-04-15
Supplement: s1 [file s1]

## Supplement

**Table S1:**

**Pearson Correlations of birth weight (BW) and the Aortic PS, ED, Ns, ISI, IFI, NT, CRL, and MA in 24 live births.**

|        | BW | ISI   | Ns      | PS      | ED      | PS+ED   | IFI     | MA     | NT     | CRL    | GP (%)  |
|--------|----|-------|---------|---------|---------|---------|---------|--------|--------|--------|---------|
| BW     | 1  | 0.023 | 0.114   | 0.118   | -0.025  | 0.098   | -0.110  | 0.383  | 0.431* | 0.395  | -0.251  |
| ISI    |    | 1     | 0.677** | -0.508* | -0.327  | -0.508* | -0.035  | -0.363 | 0.222  | -0.229 | -0.413* |
| Ns     |    |       | 1       | 0.242   | 0.168   | 0.245   | -0.096  | -0.283 | 0.337  | -0.001 | -0.137  |
| PS     |    |       |         | 1       | 0.575** | 0.986** | -0.147  | 0.179  | 0.147  | 0.364  | 0.381   |
| ED     |    |       |         |         | 1       | 0.704** | 0.713** | -0.031 | 0.200  | 0.317  | 0.359   |
| PS+ED  |    |       |         |         |         | 1       | 0.019   | 0.149  | 0.168  | 0.381  | 0.405*  |
| IFI    |    |       |         |         |         |         | 1       | -0.135 | 0.109  | 0.100  | 0.134   |
| MA     |    |       |         |         |         |         |         | 1      | 0.090  | 0.177  | 0.065   |
| NT     |    |       |         |         |         |         |         |        | 1      | 0.353  | 0.230   |
| CRL    |    |       |         |         |         |         |         |        |        | 1      | 0.183   |
| GP (%) |    |       |         |         |         |         |         |        |        |        | 1       |

\*. Correlation is significant at the 0.05 level (two-tailed).

GP (%): Growth Percentile

\*\* . Correlation is significant at the 0.01 level (two-tailed).
